# Supplementary material for: Temporal Evolution of Serum Concentrations of High‐Sensitivity Cardiac Troponin During 1 Year After Acute Coronary Syndrome Admission
Source: PubMed Central journal article supplement — J Am Heart Assoc. 2020 Dec 16;10(1):e017393. doi: 10.1161/JAHA.120.017393 (PMC7955490; doi:10.1161/jaha.120.017393), 2020-12-16
Supplement: JAH3-10-e017393-s001.pdf [file JAH3-10-e017393-s001.pdf]

# **SUPPLEMENTAL MATERIAL**

## Data S1.

### Supplemental Methods

The  $CV_i$  was defined as the median value of the CVs of the repeated measurements in individual subjects ( $CV_{\text{subject}}$ ), adjusted for the analytical variation:

$$CV_i = \sqrt{\text{median}(CV_{\text{subject}}^2) - CV_a^2}$$

Finally,  $CV_g$  was determined as 100% times the standard deviation ( $sd_{\bar{X}_{\text{subject}}}$ ) of the mean values of the repeated measurements in individual subjects ( $\bar{X}_{\text{subject}}$ ) by the (unweighted) mean of these means ( $\bar{X}_{\text{group}}$ ):

$$CV_g = 100\% * sd_{\bar{X}_{\text{subject}}} / \bar{X}_{\text{group}}$$

The *Index of Individuality (II)* is the ratio of the combined within-subject and analytical variation relative to the between-subject variation:

$$II = \sqrt{CV_i^2 + CV_a^2} / CV_g$$

When the  $II < 0.6$ , it is agreed that subjects should have their own reference values, based on previous samples.<sup>17</sup> When the  $II > 1.4$ , a population-based reference is preferred.

The *Reference Change Value (RCV)* reflects the limit of (relative) change in biomarker values in individual subjects that can be explained by the combined within-subject and analytical variation. For biomarkers with a normal distribution, the RCV can be calculated as follows:

$$RCV = Z_{\alpha/2} * \sqrt{2(CV_i^2 + CV_a^2)}$$

where  $Z_{\alpha/2}$  represents the critical value of the normal distribution for  $100\% * (1 - \alpha)/2$  confidence. For biomarkers with a skewed distribution a log-normal approach has been described,<sup>18</sup> and the RCV limits can be determined as follows:

$$\text{RCV}_{\text{downward}} = e^{-Z_{\alpha/2} * \sqrt{2 \ln(\text{CV}_w^2 + \text{CV}_a^2 + 1)}} - 1$$
$$\text{RCV}_{\text{upward}} = e^{Z_{\alpha/2} * \sqrt{2 \ln(\text{CV}_w^2 + \text{CV}_a^2 + 1)}} - 1$$

We used  $\alpha = 0.05$  (for 95% confidence), thus  $Z_{0.025} = 1.96$ .

**Table S1. Association between baseline characteristics and inter-individual variation of high-sensitivity troponin.**

|                               | hsTnI                  |         | hsTnT                  |         |
|-------------------------------|------------------------|---------|------------------------|---------|
|                               | estimate (95%CI)       | P-value | estimate (95%CI)       | P-value |
| Male sex                      | 0.002 (-0.686, 0.691)  | 0.994   | -0.064 (-0.669, 0.541) | 0.834   |
| Age, y                        | -0.01 (-0.04, 0.02)    | 0.503   | -0.022 (-0.048, 0.003) | 0.088   |
| Current Smoking, yes          | 0.072 (-0.501, 0.645)  | 0.804   | -0.15 (-0.652, 0.352)  | 0.555   |
| Diabetes, yes                 | -0.53 (-1.269, 0.209)  | 0.158   | -0.213 (-0.867, 0.441) | 0.519   |
| Hypertension, yes             | -0.01 (-0.576, 0.556)  | 0.972   | 0.192 (-0.303, 0.688)  | 0.443   |
| Hypercholesterolemia, yes     | 0.094 (-0.474, 0.662)  | 0.744   | -0.17 (-0.668, 0.328)  | 0.5     |
| Family history of CAD, yes    | -0.061 (-0.633, 0.511) | 0.832   | 0.193 (-0.379, 0.765)  | 0.503   |
| BMI                           | -0.029 (-0.108, 0.05)  | 0.467   | -0.032 (-0.101, 0.038) | 0.368   |
| Heart Rate                    | 0.004 (-0.013, 0.021)  | 0.637   | -0.005 (-0.02, 0.009)  | 0.485   |
| Systolic blood pressure, mmHg | -0.001 (-0.012, 0.009) | 0.842   | -0.002 (-0.011, 0.007) | 0.702   |
| Killip-class                  | 0.782 (-0.859, -2.544) | 0.947   | 0.52 (-0.92, -2.254)   | 0.717   |
| Aspirin                       | 0.516 (-1.122, 2.153)  | 0.533   | 0.556 (-0.881, 1.992)  | 0.445   |
| BetaBlocker                   | -0.726 (-1.497, 0.045) | 0.065   | 0.088 (-0.601, 0.777)  | 0.8     |
| ACE inhibitor                 | 0.059 (-0.555, 0.672)  | 0.85    | -0.04 (-0.579, 0.498)  | 0.882   |
| ARB                           | 0.294 (-0.599, 1.188)  | 0.515   | 0.088 (-0.698, 0.874)  | 0.824   |
| Statin                        | -1.864 (-3.827, 0.099) | 0.062   | -0.326 (-2.081, 1.428) | 0.713   |

Betas for increase/decrease in Cvi for the different baseline characteristics

95%CI: 95% confidence interval; Y: year; CAD: coronary artery disease; BMI: body Mass Index; ARB: angiotensin renin blocker
